# Supplementary material
Source: ML conference proceedings conference paper supplement (https://proceedings.neurips.cc/paper_files/paper/2021/hash/ef82567365bc6a0efb05d21837257424-Abstract.html)
Supplement: Supplementary file 1 [file ef82567365bc6a0efb05d21837257424-Supplemental.pdf]

# Appendices

## A Gradient terms for the adaptation scheme

### A.1 Gradients for the entropy approximation

Following the arguments in [13], we can compute the gradient of the term in (13) using

$$\frac{\partial}{\partial \theta_i} \mathcal{L}(\theta) = \text{Tr} \left( \sum_{k=0}^{\infty} (-1)^k [D_L]^k \frac{\partial}{\partial \theta_i} \{D_L\} \right) = \mathbb{E}_{N,\varepsilon} \left[ \sum_{k=0}^N \frac{(-1)^k}{p_k} \varepsilon^\top [D_L]^k \frac{\partial}{\partial \theta_i} \{D_L\} \varepsilon \right],$$

which yields a stochastic gradient via a Russian-roulette estimator.

Additionally, to avoid gradients with infinite means even if  $D_L$  is not contractive, we consider a spectral normalisation, so that instead of computing recursively  $\eta_0 = \varepsilon$  and  $\eta_k = D_L \eta_{k-1}$  for  $k \in \{1, \dots, N\}$ , we set  $\bar{\eta}_0 = \varepsilon$  and

$$\bar{\eta}_k = D_L \bar{\eta}_{k-1} \cdot \min \{1, \delta' \|\bar{\eta}_{k-1}\|_2 / \|D_L \bar{\eta}_{k-1}\|_2\} \quad (15)$$

for  $k \in \{1, \dots, N\}$  and  $\delta' \in (0, 1)$ , such as  $\delta' = 0.99$  in all our experiments. We obtain an estimator

$$\frac{\partial}{\partial \theta_i} \mathcal{L}(\theta) \approx \mathbb{E}_{N,\varepsilon} \left[ \sum_{k=0}^N \frac{(-1)^k}{p_k} \bar{\eta}_k^\top \frac{\partial}{\partial \theta_i} \{D_L\} \varepsilon \right].$$

### A.2 Gradients for the penalty function

We used the following penalty function

$$h(x) = (x - \delta)^2 \mathbb{1}_{\{x \in [\delta, \delta_2]\}} + ((\delta_2 - \delta)^2 + (\delta_2 - \delta)^2 (x - \delta_2)) \mathbb{1}_{\{x \geq \delta_2\}}$$

throughout our experiments with  $\delta \in \{0.75, 0.95\}$ , and  $\delta_2 = 1 + \delta$ . The motivation was to have a quadratic increase for the penalty term if the largest absolute eigenvalue approaches 1, and then smoothly switch to a linear function for values larger than  $\delta_2$ . Gradients for this function can be computed routinely using automatic differentiation.

### A.3 Gradients for the energy error

We can write the energy error as

$$\begin{aligned} \Delta(q_0, v) &= U(\mathcal{T}_L(v)) - U(q_0) + K(\mathcal{W}_L(v)) - K(C^{-\top} v) \\ &= U \left( q_0 + LhCv - h^2 CC^\top \Xi_L(v) - L \frac{h^2}{2} CC^\top \nabla U(q_0) \right) - U(q_0) \\ &\quad + \frac{1}{2} \left\| v - \frac{h}{2} C [\nabla U(q_0) + \nabla U(q_L)] - hC \sum_{\ell=1}^{L-1} \nabla U(q_\ell) \right\|^2 - \frac{1}{2} \|v\|^2. \end{aligned} \quad (16)$$

Recall from (5) that  $\Xi_L(v)$  is a weighted sum of potential energy gradients along the leap-frog trajectory. For computing gradients of the energy-error for the fast approximation, we therefore stop the gradient for all  $\nabla U(q_\ell)$  for any  $\ell \in \{1, \dots, L\}$ .

## B Proof of Lemma 1

*Proof.* We generalise the arguments from [14], Lemma 7. Proceeding by induction over  $n$ , we have for the case  $n = 1$ , for any  $v \in \mathbb{R}^d$ , that  $D\mathcal{T}_1(v) = hC$  and  $\mathcal{S}_1(v) = \frac{1}{h} C^{-1} q_0 - \frac{h}{2} C^\top \nabla U(q_0)$  with derivative of zero. For the case  $n = 2$ , using (3) and (5), one obtains

$$D\mathcal{T}_2(v) = 2hC - h^3 CC^\top \nabla^2 U(\mathcal{T}_1(v)) C \quad (17)$$

and moreover

$$\text{DS}_2(v) = -\frac{h^2}{2} C^\top \nabla^2 U(\mathcal{T}_1(v)) C \quad (18)$$

which establishes (10). Clearly,  $\|\text{DS}_2(v)\|_2 < \frac{1}{8}$  if  $2^2 h^2 < \frac{1}{4\|C^\top \nabla^2 U(\mathcal{T}_1(v)) C\|_2}$ . Further, for any  $n < L$ , again from (3) and (5),

$$\begin{aligned} \text{DT}_{n+1}(v) &= (n+1)hC - h^2 C C^\top \text{D}\Xi_{n+1}(v) \\ &= (n+1)hC - h^2 C C^\top \left[ \sum_{i=1}^n (n+1-i) \nabla^2 U(\mathcal{T}_i(v)) \text{DT}_i(v) \right] \\ &= (n+1)hC - h^2 C C^\top \left[ \sum_{i=1}^n (n+1-i) \nabla^2 U(\mathcal{T}_i(v)) i h C (\text{I} + \text{DS}_i(v)) \right] \\ &= (n+1)hC + (n+1)hC \left[ -h^2 \sum_{i=1}^n \frac{(n+1-i)}{n+1} i C^\top \nabla^2 U(\mathcal{T}_i(v)) C (\text{I} + \text{DS}_i(v)) \right], \end{aligned}$$

which shows the representation (10) for the case  $n+1$  by recalling that

$$\text{DT}_{n+1}(v) = (n+1)hC (\text{I} + \text{DS}_{n+1}(v)).$$

Assume now that  $\|\text{DS}_\ell(v)\|_2 < 1/8$  holds for all  $\ell \leq n$ . Then for any  $v \in \mathbb{R}^d$

$$\begin{aligned} \|\text{DS}_{n+1}(v)\|_2 &\leq \frac{h^2}{n+1} \sum_{i=1}^n i(n+1-i) \|C^\top \nabla^2 U(\mathcal{T}_i(v)) C\|_2 \|\text{I} + \text{DS}_i(v)\|_2 \\ &\leq \frac{h^2}{n+1} \sum_{i=1}^n \frac{L^2}{4} \|C^\top \nabla^2 U(\mathcal{T}_i(v)) C\|_2 \|\text{I} + \text{DS}_i(v)\|_2 \\ &\leq \frac{h^2}{n+1} \sum_{i=1}^n \frac{L^2}{4} \frac{1}{4L^2 h^2} \left(1 + \frac{1}{8}\right) \leq \frac{1}{8} \end{aligned}$$

where the second inequality follows from  $(n+1-i)i \leq \left(\frac{n+1-i+i}{2}\right)^2 \leq \frac{L^2}{4}$ , whereas the third inequality follows from the induction hypothesis and the assumption  $L^2 h^2 < \sup_q \frac{1}{4\|C^\top \nabla^2 U(q) C\|_2}$ .  $\square$

## C Extension to learn non-linear transformations

The suggested approach can perform poorly for non-convex potentials or even convex potentials such as arising in a logistic regression model for some data sets. We illustrate here how to learn a reasonable proposal for a general potential function by considering some version of position-dependent preconditioning. Consider an invertible differentiable transformation  $f: \mathbb{R}^d \rightarrow \mathbb{R}^d$ . The idea now is to run HMC with unit mass matrix for the transformed variables  $z = f^{-1}(q)$  where  $q \sim \pi$ . Write  $\tilde{\pi}$  for the density of  $z$  and let  $\tilde{U}$  be the corresponding potential energy function which is given by

$$\tilde{U}(z) = U(f(z)) - \log |\det \text{D}f(z)|$$

with gradient

$$\nabla \tilde{U}(z) = \text{D}f(z)^\top \nabla U(f(z)) - \nabla \log |\det \text{D}f(z)|.$$

The transformation  $f$  as well as  $\tilde{U}$  generally depend on some parameters  $\theta$  that we again omit for a less convoluted notation. Our approach can be seen as an alternative for instance to [31] where such a transformation is first learned by trying to approximate  $\tilde{\pi}$  with a standard Gaussian density using variational inference, while the HMC hyperparameters are adapted in a second step using Bayesian optimisation.

We write  $\tilde{\mathcal{T}}_L: v \mapsto z_L$  for the transformation that maps the initial velocity  $v = p_0 \sim \mathcal{N}(0, \text{I})$  to the  $L$ -th leapfrog step  $z_L$ , starting at  $z_0$  based on the potential function  $\tilde{U}$  with unit mass matrix  $M = \text{I}$ . Analogously, we define the mapping  $\tilde{\mathcal{W}}_L: v \mapsto p_L$  and similarly to (7), we define

$$\tilde{\mathcal{S}}_L(v) = \frac{1}{Lh} \tilde{\mathcal{T}}_L(v) - v.$$

We can then reparametrize the proposal at the point  $q_0 = f(z_0)$  by  $v \mapsto f(\tilde{\mathcal{T}}_L(v))$ . Consequently, the log-density of the proposal is given by

$$\log r_L(f(\tilde{\mathcal{T}}_L(v))) = \log \nu(v) - \log |\det \text{D}f(\tilde{\mathcal{T}}_L(v))| - \log |\det \text{D}\tilde{\mathcal{T}}_L(v)|,$$

and we can write

$$\log |\det \text{D}\tilde{\mathcal{T}}_L(v)| = d \log Lh + \log |\det(\text{I} + \text{D}\tilde{\mathcal{S}}_L(v))|.$$

We use the same approximation

$$\text{D}\tilde{\mathcal{S}}_L(v) \approx -h^2 \frac{L^2 - 1}{6} \nabla^2 \tilde{U}(z_{\lfloor L/2 \rfloor})$$

based on the transformed Hessian now.

Hessian-vector products can similarly be computed using vector-Jacobian products: With  $g(z) = \text{grad}(\tilde{U}, z)$ , we then compute  $\nabla^2 \tilde{U}(z)w = \text{vjp}(g, z, w)^\top$  for  $z = f^{-1}(\text{stop\_grad}(f(z_{\lfloor L/2 \rfloor})))$ . The motivation for stopping the gradients comes from considering the special case  $f: z \mapsto Cz$  that corresponds to the position-independent preconditioning scheme above. For such a linear transformation,

$$\tilde{U}(z) = C^\top \nabla^2 U(Cz)C.$$

To recover the previous case, we stop gradients at  $q_{\lfloor L/2 \rfloor} = f(z_{\lfloor L/2 \rfloor}) = Cz_{\lfloor L/2 \rfloor}$ .

Gradients for the log-accept ratio can be computed based on the log-accept ratio of the transformed chain [35]. The energy error of the transformed chain is

$$\begin{aligned} \Delta_\theta(q_0, v) &= U_\theta(\tilde{\mathcal{T}}_L(v)) - U_\theta(f^{-1}(q_0)) + K(\tilde{\mathcal{W}}_L(v)) - K(v) \\ &= U \left\{ f \left[ f^{-1}(q_0) + Lhv - h^2 \tilde{\Xi}_L(v) \right. \right. \\ &\quad \left. \left. - L \frac{h^2}{2} (\text{D}f(f^{-1}(q_0))^\top \nabla U(q_0) - \nabla \log |\det \text{D}f(f^{-1}(q_0))|) \right] \right\} \\ &\quad + \log |\det \text{D}f(z_L)| - U(q) + \log |\det \text{D}f(f^{-1}(q))| \\ &\quad + \frac{1}{2} \left\| v - \frac{h}{2} [\text{D}f(z_0)^\top \nabla U(f(z_0)) - \nabla \log |\det \text{D}f(z_0) + \text{D}f(z_L)^\top \nabla U(f(z_L)) \right. \\ &\quad \left. - \nabla \log |\det \text{D}f(z_L)|] - h \sum_{\ell=1}^{L-1} \text{D}f(z_\ell)^\top \nabla U(f(z_\ell)) - \nabla \log |\det \text{D}f(z_\ell)| \right\|^2 \\ &\quad - \frac{1}{2} \|v\|^2, \end{aligned}$$

where

$$\tilde{\Xi}_L(v) = \sum_{i=1}^L (L-i) [\text{D}f(z_i)^\top \nabla U(f(z_i)) - \nabla \log |\det \text{D}f(z_i)]$$

and  $z_0, \dots, z_L$  is the leap-frog trajectory starting at  $z_0 = f^{-1}(q_0)$ . We also stop all  $U$  gradients, i.e.  $\nabla U(f(z_\ell)) \leftarrow \text{stop\_grad}(\nabla U(f(z_\ell)))$ . It can be seen that this recovers the above setting if  $f: z \mapsto Cz$ .

## D Gradient-based adaptation using the expected squared jumping distance and variations

We consider the different loss functions

$$\mathcal{F}_{\text{GSM}}(\theta) = - \int \int \pi(q_0) \nu(v) \left[ \log a\{(q_0, v), (\mathcal{T}_L(v), \mathcal{W}_L(v))\} - \beta \log r_L(\mathcal{T}_L(v)) \right] dv dq_0 \quad (19)$$

$$\mathcal{F}_{\text{ESJD}}(\theta) = - \int \int \pi(q_0) \nu(v) \left[ a\{(q_0, v), (\mathcal{T}_L(v), \mathcal{W}_L(v))\} \|q_0 - \mathcal{T}_L(v)\|^2 \right] dv dq_0 \quad (20)$$

$$\mathcal{F}_{\text{L2HMC}}(\theta) = - \int \int \pi(q_0) \nu(v) \left[ \frac{a\{(q_0, v), (\mathcal{T}_L(v), \mathcal{W}_L(v))\} \|q_0 - \mathcal{T}_L(v)\|^2}{\lambda} - \frac{\lambda}{a\{(q_0, v), (\mathcal{T}_L(v), \mathcal{W}_L(v))\} \|q_0 - \mathcal{T}_L(v)\|^2} \right] dv dq_0. \quad (21)$$

The L2HMC objective (21) has been suggested in Levy et al. [40] for learning generalisations of HMC, although we ignore a burn-in term that has been included originally. In our implementation, we adapt  $\lambda > 0$  online as a moving average of the expected squared jumping distance. The objectives (20) and (21) can be optimized using stochastic gradient descent similar to Algorithm 1 without the approximations as required for the GSM objective (19).

## E Proof of the HMC proposal reparameterizations

For completeness, we provide a proof of the reparameterization (3) and (4) of the  $L$ -th step position  $q_L$  and momentum  $p_L$  using the velocity  $v$  that relates to the initial momentum  $p_0 \sim \mathcal{N}(0, M)$  via  $p_0 = C^{-\top} v$ . Such representations with an identity mass matrix have been used previously in [42, 21, 14].

*Proof.* We proceed by induction over  $\ell \in \{1, \dots, L\}$ . For the case  $\ell = 1$ , the recursions in (2) imply

$$q_1 = q_0 + hCC^\top \left[ p_0 - \frac{h}{2} \nabla U(q_0) \right] = q_0 + hCv - \frac{h}{2} CC^\top \nabla U(q_0)$$

and

$$p_1 = \left[ p_0 - \frac{h}{2} \nabla U(q_0) \right] - \frac{h}{2} \nabla U(q_1) = C^{-\top} v - \frac{h}{2} [\nabla U(q_0) + \nabla U(q_1)].$$

Suppose now that the representations hold for  $1 \leq \ell < L$ . Then, using the recursions in (2),

$$\begin{aligned} q_{\ell+1} &= q_\ell + hCC^\top \left[ p_\ell - \frac{h}{2} \nabla U(q_\ell) \right] \\ &= q_0 - \left[ \frac{\ell h^2}{2} CC^\top + \frac{h}{2} CC^\top \right] \nabla U(q_0) + [\ell hC + hCC^\top C^{-\top}] v - h^2 CC^\top \nabla U(q_\ell) \\ &\quad - h^2 CC^\top \sum_{i=1}^{\ell-1} \nabla U(q_i) - h^2 CC^\top \Xi_\ell(v) \\ &= q_0 - \left[ (\ell+1) \frac{h^2}{2} CC^\top \right] \nabla U(q_0) + (\ell+1) hCv - h^2 CC^\top \sum_{i=1}^{\ell} \nabla(\ell+1-i) \nabla U(q_i). \end{aligned}$$

This establishes the representation for  $q_L$ . The induction step for the momentum is a straightforward application of (2) to the induction hypothesis.  $\square$

## F Gaussian targets experiments

### F.1 High-dimensional Gaussian targets

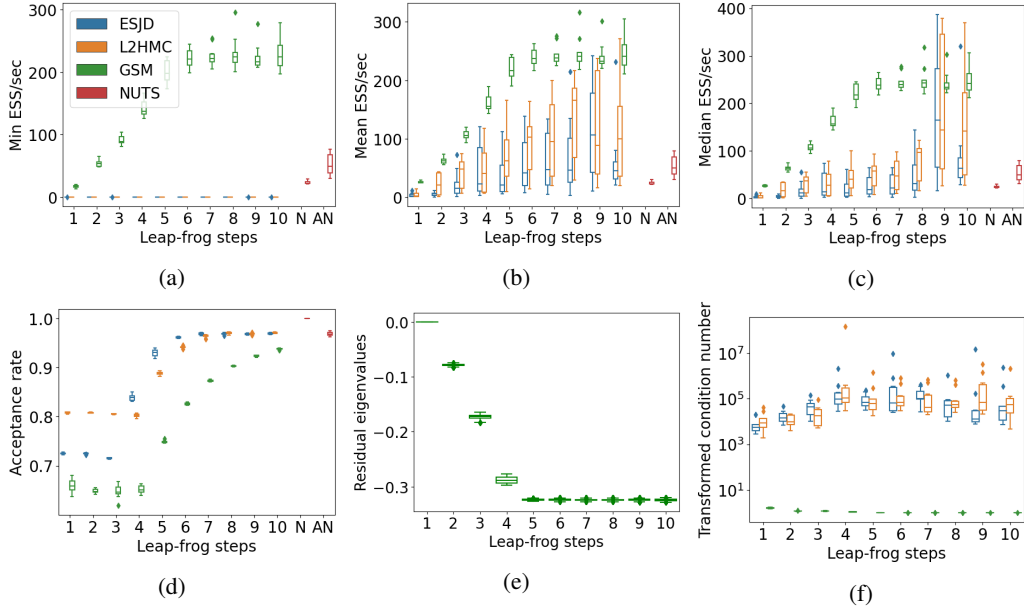

Figure 7: Anisotropic Gaussian target ( $d = 1000$ ). Minimum (7a), mean (7b) and median (7c) effective sample size of  $q \mapsto q_i$  per second. Average acceptance rates in 7d and estimates of the eigenvalues of  $D_L$  in 7e. Condition number of transformed Hessian  $C^\top \Sigma^{-1} C$  in 7f.

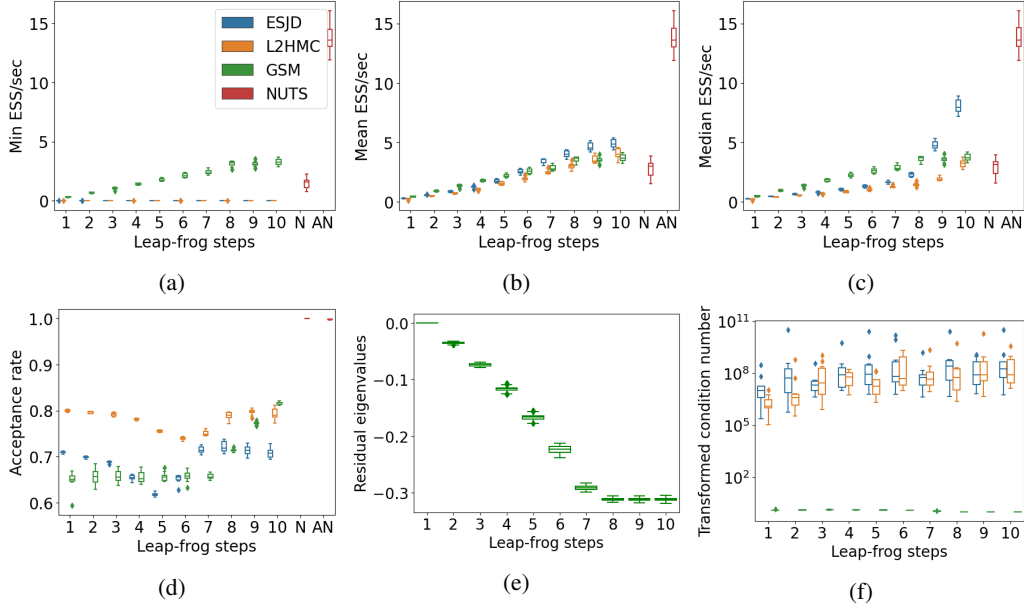

Figure 8: Independent Gaussian target ( $d = 10000$ ). Minimum (8a), mean (8b) and median (8c) effective sample size of  $q \mapsto q_i$  per second. Average acceptance rates in 8d and estimates of the eigenvalues of  $D_L$  in 8e. Condition number of transformed Hessian  $C^\top \Sigma^{-1} C$  in 8f.

## F.2 Ill-conditioned anisotropic Gaussian target

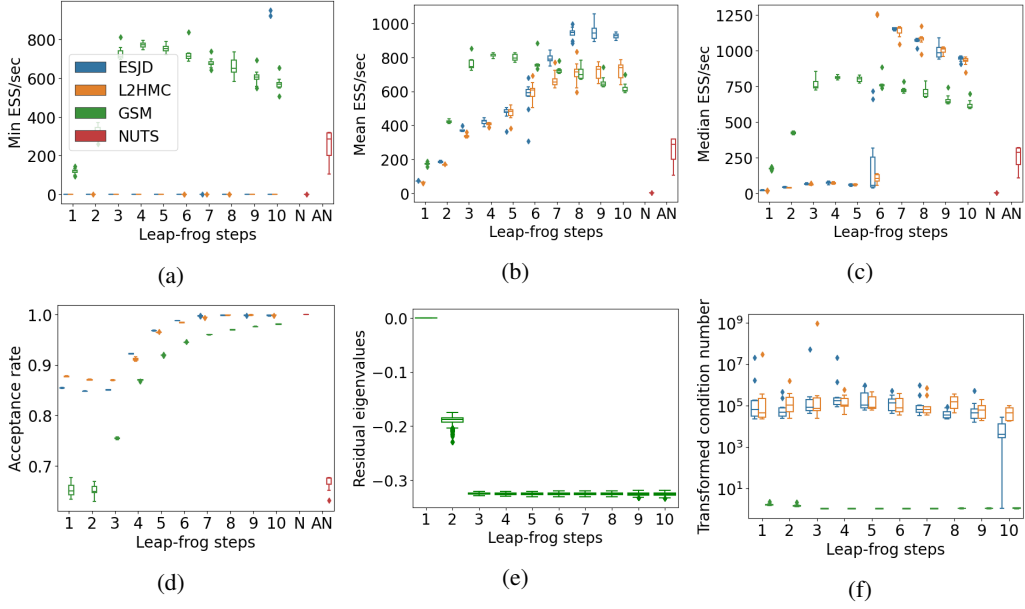

Figure 9: Ill-conditioned Gaussian target ( $d = 100$ ). Minimum (9a), mean (9b) and median (9c) effective sample size of  $q \mapsto q_i$  per second. Average acceptance rates in 9d and estimates of the eigenvalues of  $D_L$  using power iteration in 9e. Condition number of transformed Hessian  $C^\top \Sigma^{-1} C$  in 9f. Values computed after adaptation.

## F.3 Correlated Gaussian target

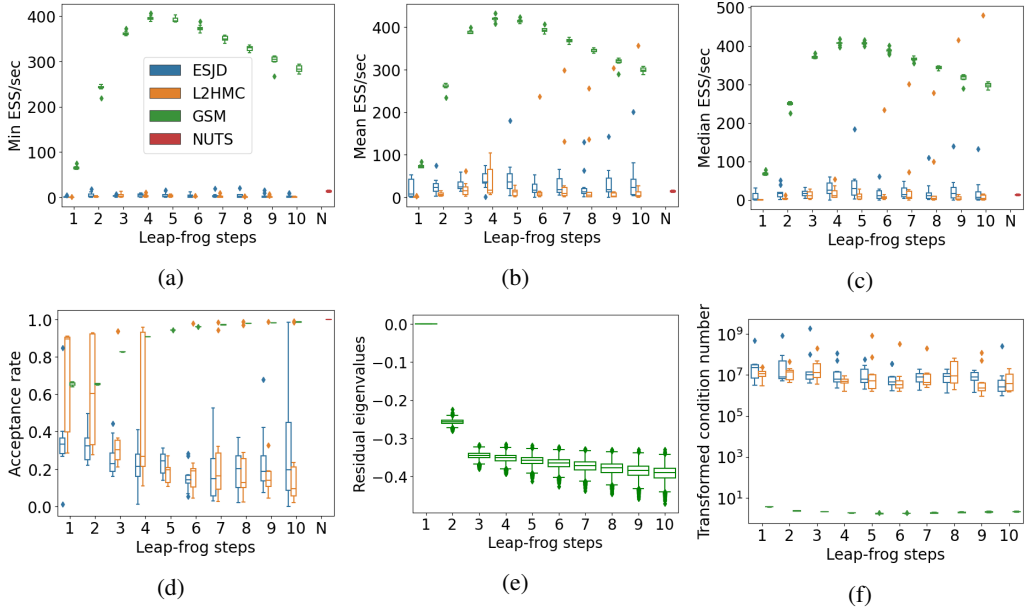

Figure 10: Correlated Gaussian target ( $d = 51$ ). Minimum (10a), mean (10b) and median (10c) effective sample size of  $q \mapsto q_i$  per second. Average acceptance rates in 10d and estimates of the eigenvalues of  $D_L$  using power iteration in 10e. Condition number of transformed Hessian  $C^\top \Sigma^{-1} C$  in 10f. Values computed after adaptation.

## F.4 IID Gaussian target

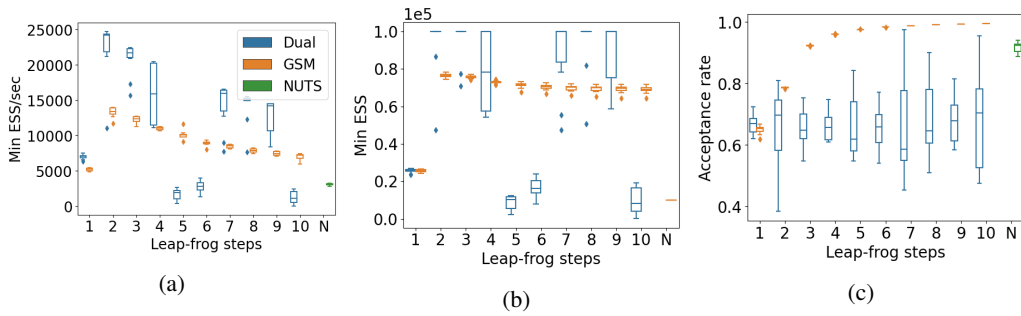

Figure 11: IID Gaussian target ( $d = 10$ ). Minimum effective sample size of  $q \mapsto q_i$  per second in 11a and absolute minimum effective sample size where NUTS is run for 1/10-th of the iterations of the other schemes in 11b. Average acceptance rates in 11c. Values computed after adaptation.

## G Logistic regression experiments

### G.1 Australian credit data

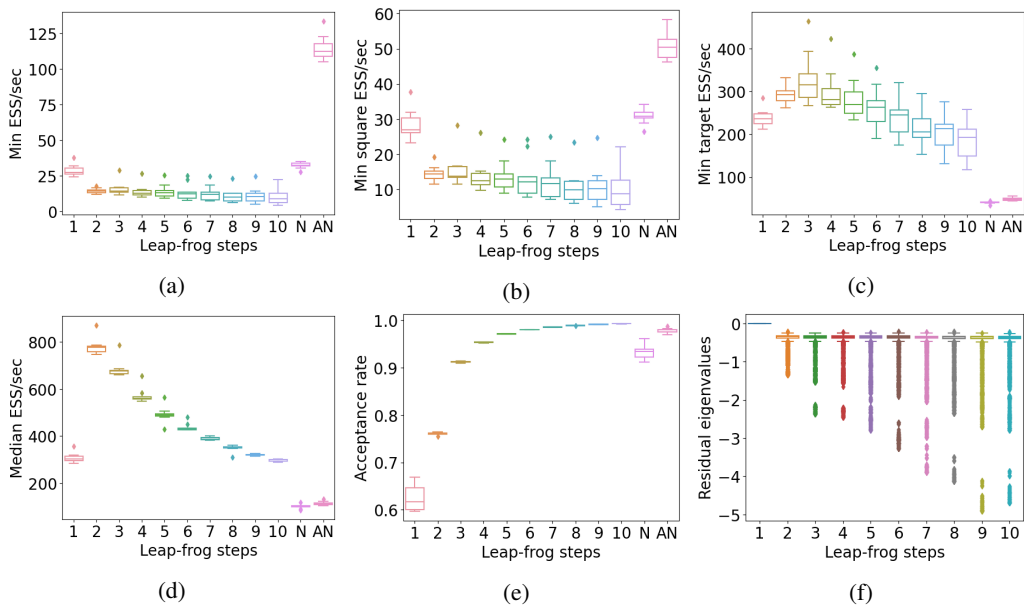

Figure 12: Bayesian logistic regression for Australian Credit data set ( $d = 15$ ). Minimum effective sample size per second after adaptation of  $q \mapsto q_i$  in 12a, of  $q \mapsto q_i^2$  in 12b and of  $q \mapsto \log \pi(q)$  in 12b. Median marginal effective sample per second in 12d and average acceptance rates in 12e and estimates of the eigenvalues of  $D_L$  in 12f.

## G.2 Heart data

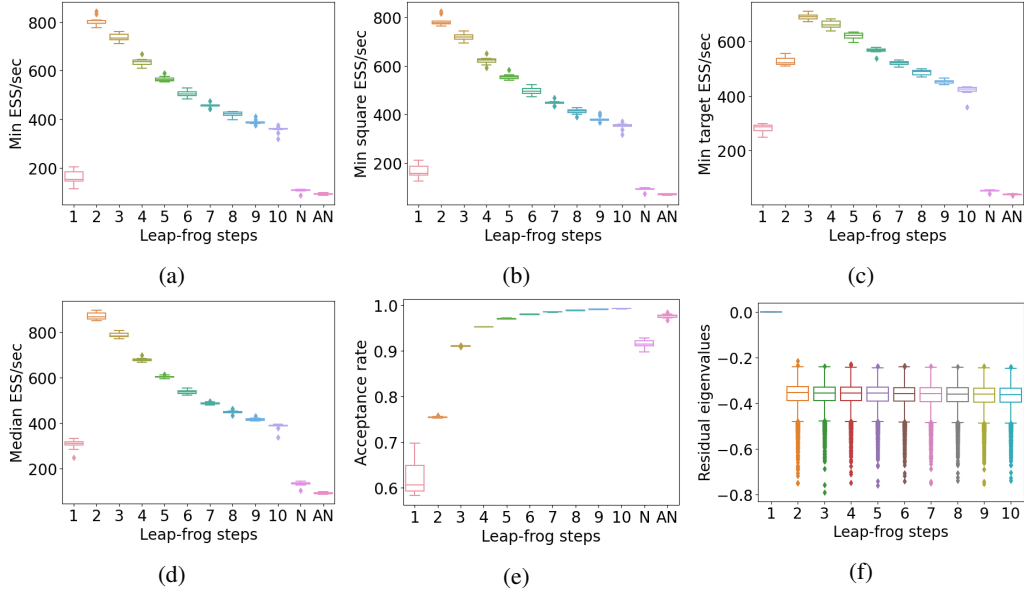

Figure 13: Bayesian logistic regression for heart data set ( $d = 14$ ). Minimum effective sample size per second after adaptation of  $q \mapsto q_i$  in 13a, of  $q \mapsto q_i^2$  in 13b and of  $q \mapsto \log \pi(q)$  in 13c. Median marginal effective sample per second in 13d and average acceptance rates in 13e and estimates of the eigenvalues of  $D_L$  in 13f.

## G.3 Pima data

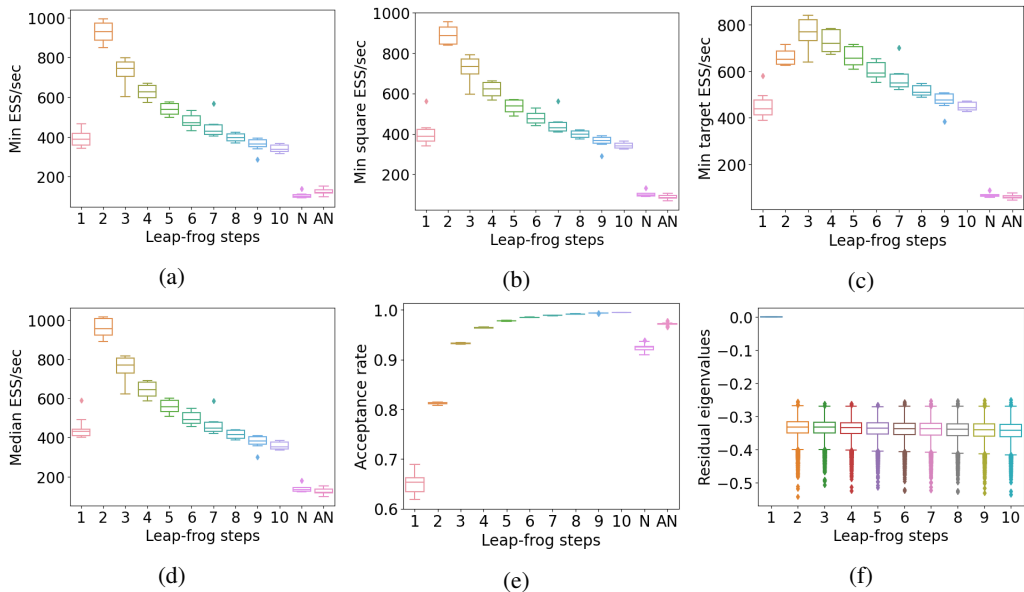

Figure 14: Bayesian logistic regression for Pima data set ( $d = 8$ ). Minimum effective sample size per second after adaptation of  $q \mapsto q_i$  in 14a, of  $q \mapsto q_i^2$  in 14b and of  $q \mapsto \log \pi(q)$  in 14c. Median marginal effective sample per second in 14d and average acceptance rates in 14e and estimates of the eigenvalues of  $D_L$  in 14f.



## G.4 Ripley data

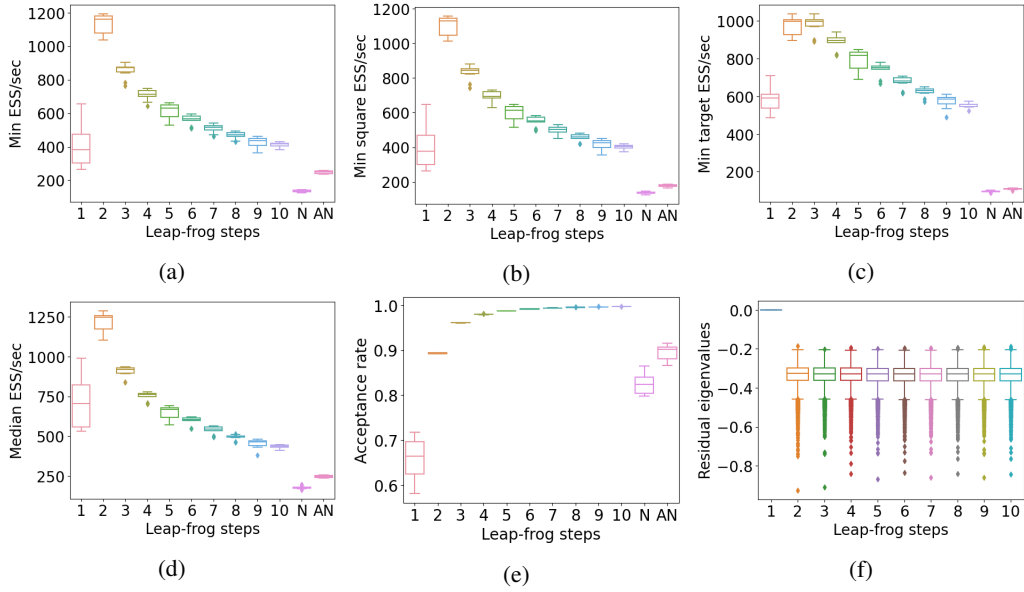

Figure 15: Bayesian logistic regression for Ripley data set ( $d = 3$ ). Minimum effective sample size per second after adaptation of  $q \mapsto q_i$  in 15a, of  $q \mapsto q_i^2$  in 15b and of  $q \mapsto \log \pi(q)$  in 15c. Median marginal effective sample per second in 15d and average acceptance rates in 15e and estimates of the eigenvalues of  $D_L$  in 15f.

## G.5 German credit data

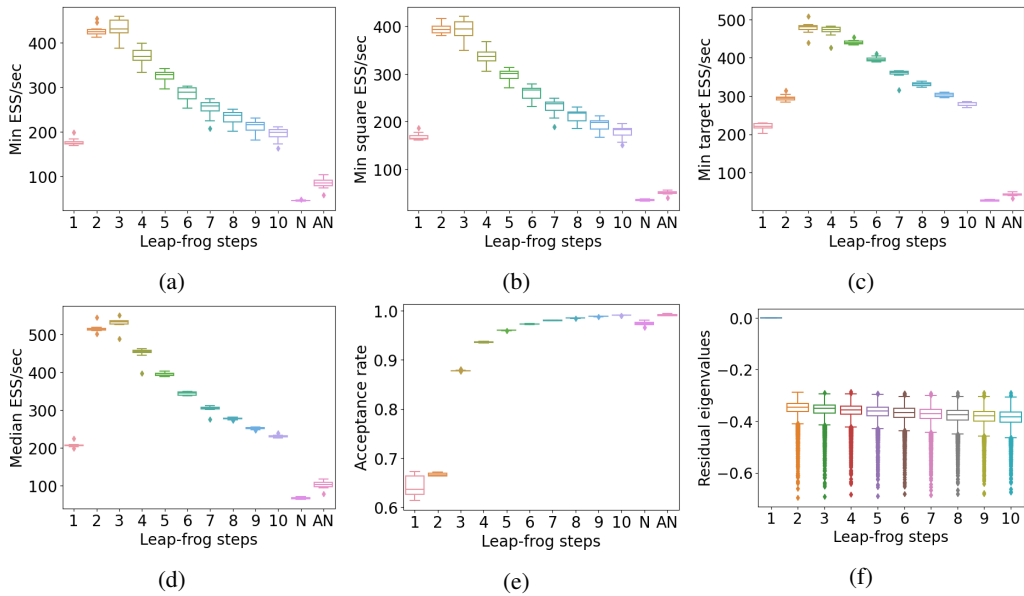

Figure 16: Bayesian logistic regression for German credit data set ( $d = 25$ ). Minimum effective sample size per second after adaptation of  $q \mapsto q_i$  in 16a, of  $q \mapsto q_i^2$  in 16b and of  $q \mapsto \log \pi(q)$  in 16c. Median marginal effective sample per second in 16d and average acceptance rates in 16e and estimates of the eigenvalues of  $D_L$  in 16f.

## G.6 Caravan data

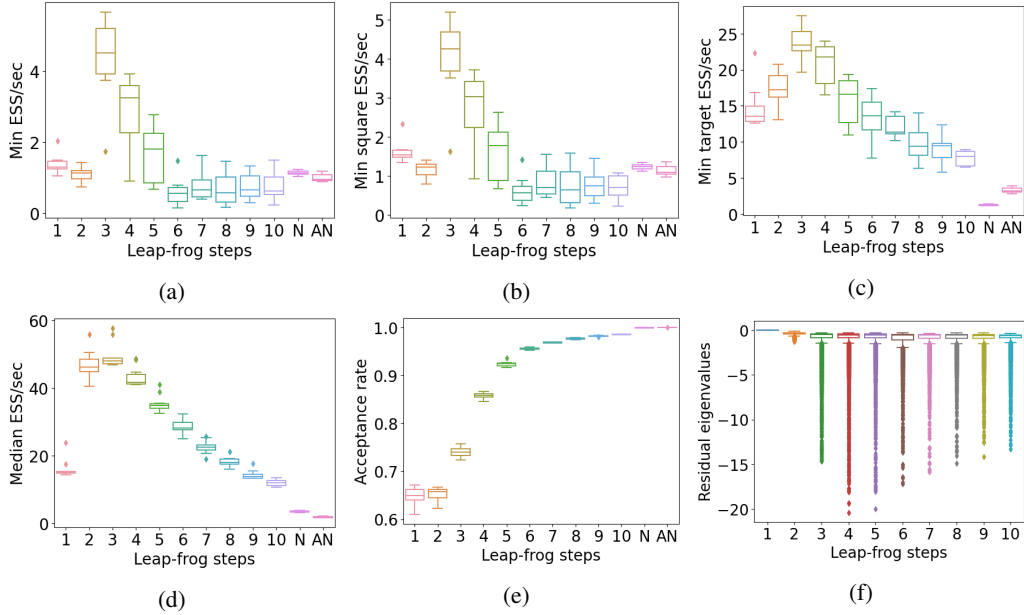

Figure 17: Bayesian logistic regression for Caravan data set ( $d = 87$ ). Minimum effective sample size per second after adaptation of  $q \mapsto q_i$  in 17a, of  $q \mapsto q_i^2$  in 17b and of  $q \mapsto \log \pi(q)$  in 17c. Median marginal effective sample per second in 17d and average acceptance rates in 17e and estimates of the eigenvalues of  $D_L$  in 17f.

## H Log-Gaussian Cox Point Process

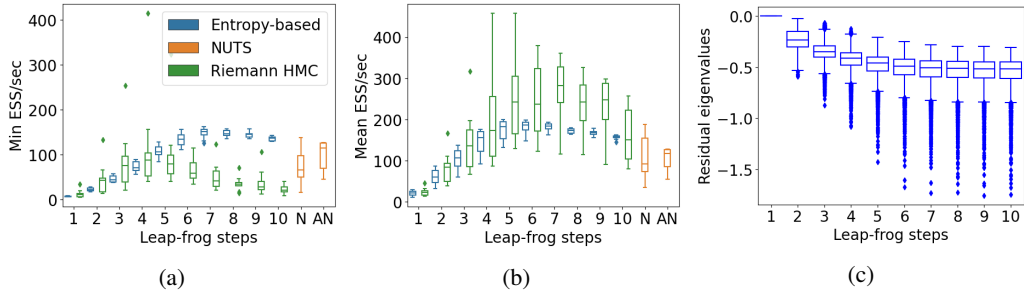

Figure 18: Cox process in dimension  $d = 64$ . Minimum (18a) and mean (18b) effective sample size per second after adaptation. Estimates of the eigenvalues of  $D_L$  using power iteration in (18c).

## I Stochastic volatility model

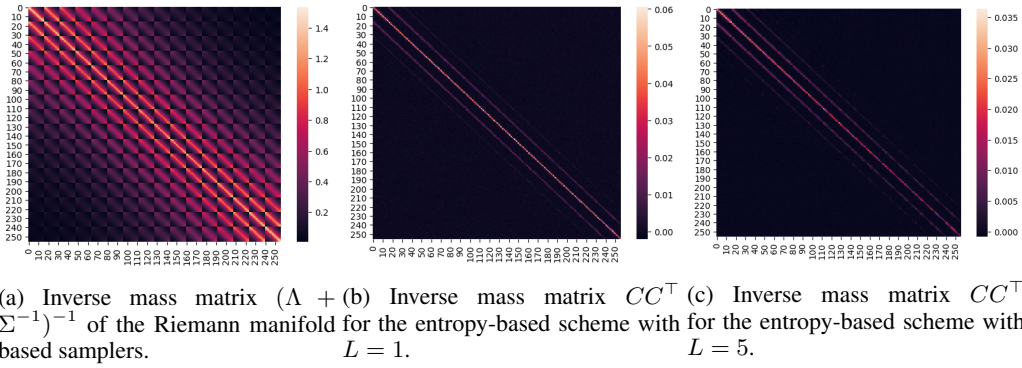

Figure 19: Inverse mass matrices for the Cox process with  $d = 256$  for the different schemes.

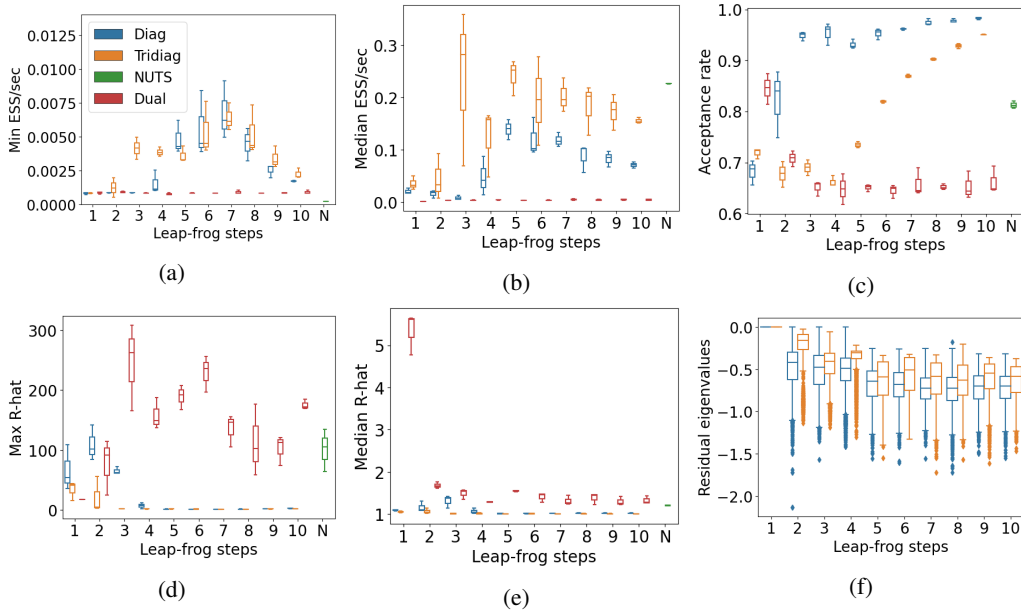

Figure 20: MCMC mixing efficiency for the stochastic volatility model ( $d = 2519$ ) after adaptation: Minimum (20a) and median (20b) effective sample size per second. Maximum (20d) and median (20e)  $\hat{R}$  of  $q \mapsto q_i$ . Average acceptance rates (20c) and estimates of the eigenvalues of  $D_L$  (20f).

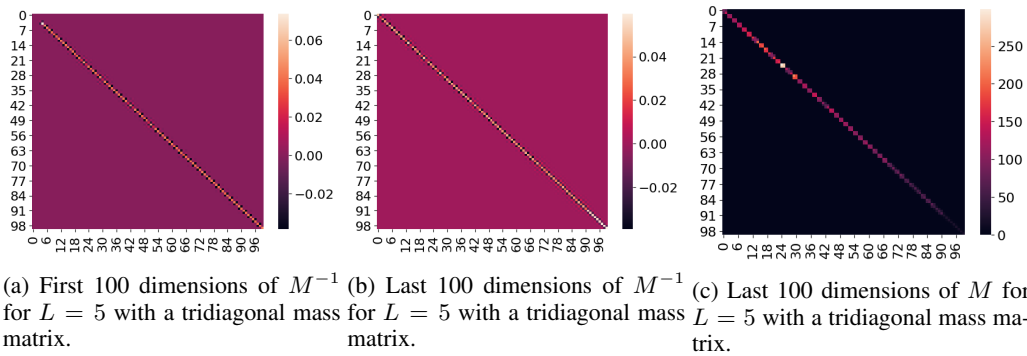

Figure 21: Learned (inverse) mass matrices for the stochastic volatility model.
